# Supplementary material
Source: PubMed Central journal article supplement (PMC5927834)

**Supplemental Fig. 2: Effect of mating on JH hemolymph titers.** Virgin and mated males were fed a 20% sucrose solution. JH titers in hemolymph were evaluated at different days after emergence. JH titers are expressed as fmol/insect. Bars represent the means  $\pm$  SEM of 8 to 16 independent replicates of groups of 5 insects. Asterisk denotes significant difference (unpaired t-test; \*  $P \leq 0.05$ , \*\*\*  $P \leq 0.001$ ). ns denotes no significant difference (unpaired t-test).

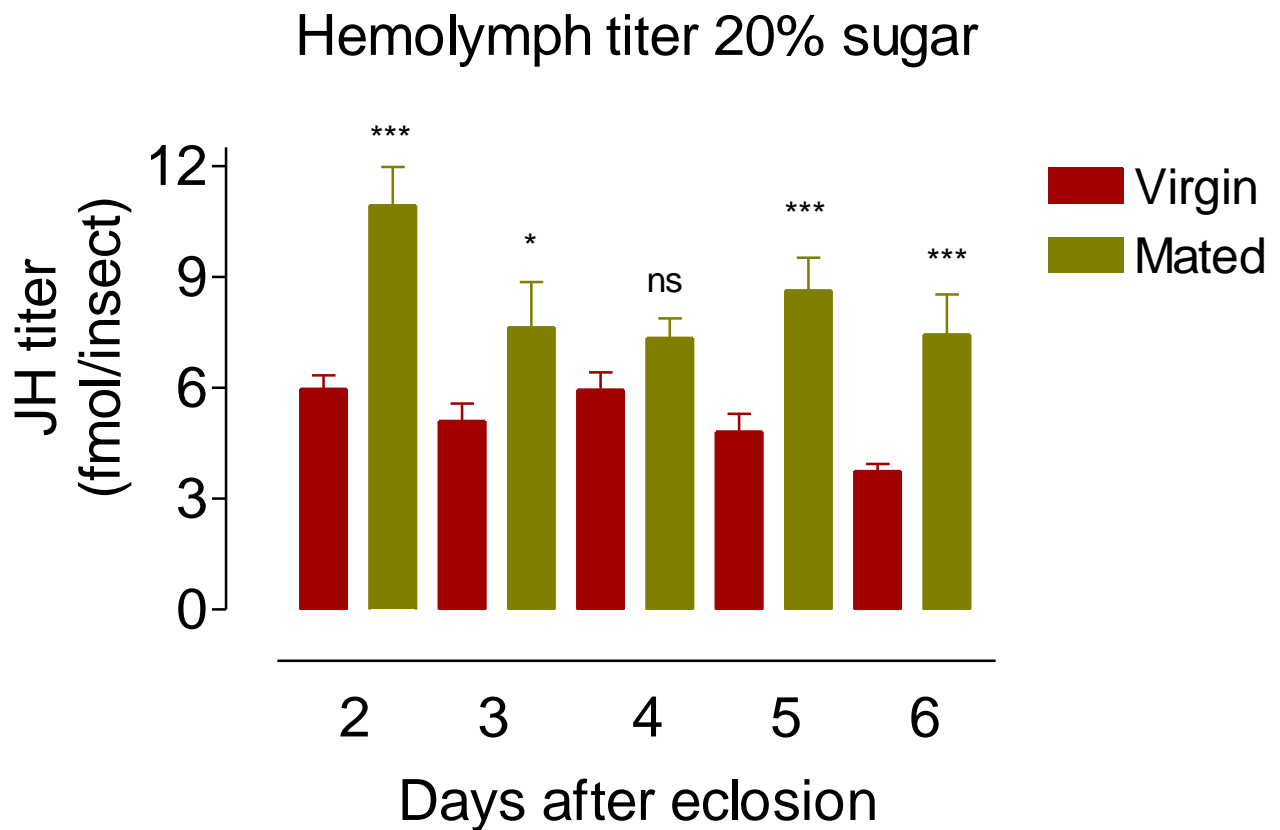

Supplement: NIHMS949841-supplement-1.pdf [file NIHMS949841-supplement-1.pdf]
