# Supplementary material
Source: PubMed Central journal article supplement (PMC5927834)

**Supplemental Fig. 1:** Relationship between JH biosynthesis and JH hemolymph titers from pupa, and adult males.  $P \leq 0.006$ .  $r^2=0.6$

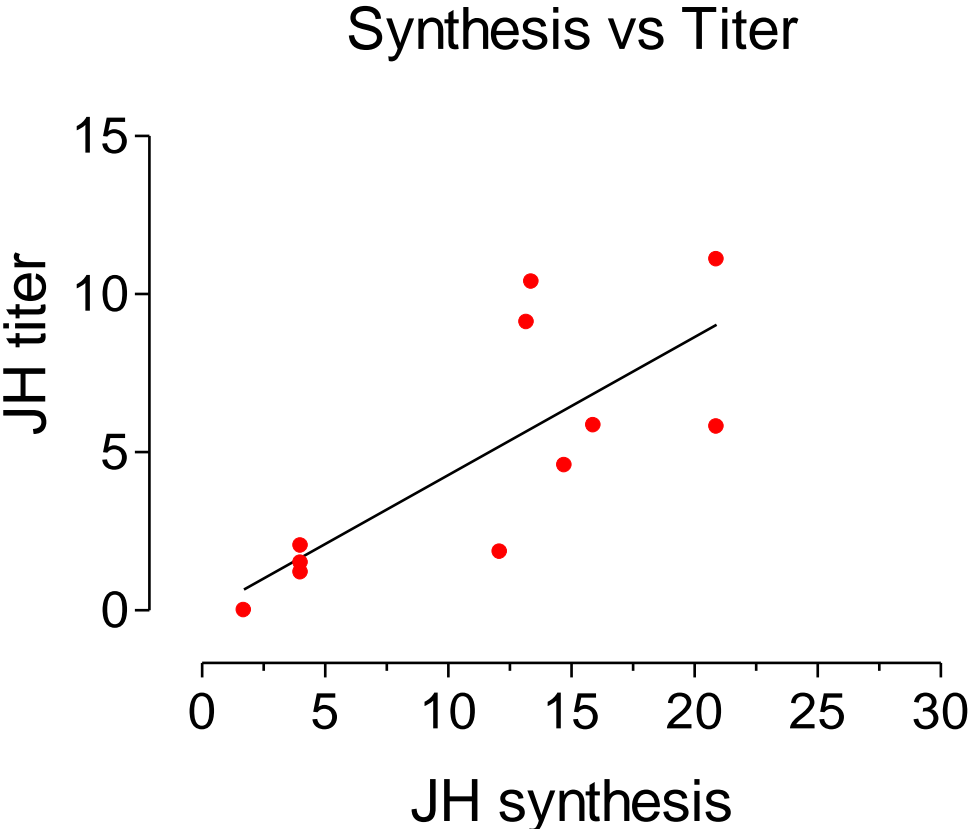

Supplement: NIHMS949841-supplement-2.pdf [file NIHMS949841-supplement-2.pdf]
